# Supplementary material for: Host specificity of gastrointestinal parasites in free-ranging sloths from Costa Rica
Source: PeerJ. 2025 May 8;13:e19408. doi: 10.7717/peerj.19408 (PMC12066103; doi:10.7717/peerj.19408)
Supplement: Supplemental Information 3 — A unique identifier for each fecal sample, with information on sloth species, habitat, collection date, the presence of any parasite (positive/negative), the parasite morphotype(s) detected, and the total parasite richness in cases of coinfection. [file peerj-13-19408-s003.xlsx]

## Sheet: Hoja1
Field code	Sloth species	Habitat	Date (dd/mm/yy)	Positive (1) Negative (0)	Parasite egg morphotypes								Coinfection
					Anoplocephalidae morphotype 1	Spirocercidae egg morphotype 2	Coccidia cyst morphotype 2	Ascariadae egg morphotype	Spirurida egg morphotype	Spirocercidae egg morphotype 1	Subuluroidea egg morphotype	Coccidia cyst morphotype 1
Bv001	Bradypus variegatus	Primary Forest	2023-03-05	1	0	0	0	0	1	0	0	0	1
Bv002	Bradypus variegatus	Urban	2023-03-22	0	0	0	0	0	0	0	0	0	0
Bv003	Bradypus variegatus	Urban	2023-03-22	1	0	0	0	0	1	0	0	1	1
Bv004	Bradypus variegatus	Primary Forest	2023-04-13	1	0	0	0	0	0	0	0	1	0
Bv005	Bradypus variegatus	Primary Forest	2023-04-13	0	0	0	0	0	0	0	0	0	0
Bv007	Bradypus variegatus	Primary Forest	2023-04-17	1	0	0	0	0	1	0	0	0	1
Bv008	Bradypus variegatus	Urban	2023-04-01	1	0	0	0	0	0	0	0	1	0
Bv009	Bradypus variegatus	Urban	2023-04-25	1	0	0	0	0	1	0	0	0	1
Bv011	Bradypus variegatus	Primary Forest	2023-06-02	0	0	0	0	0	0	0	0	0	0
Bv012	Bradypus variegatus	Primary Forest	2023-06-02	1	0	0	0	1	0	0	0	0	1
Bv014	Bradypus variegatus	Primary Forest	2023-06-02	0	0	0	0	0	0	0	0	0	0
Bv015	Bradypus variegatus	Urban	2023-06-03	1	0	0	0	0	1	0	0	0	1
Bv016	Bradypus variegatus	Urban	2023-04-01	1	0	0	0	0	0	0	0	1	0
Bv017	Bradypus variegatus	Urban	2023-04-25	1	0	0	0	0	0	1	0	1	1
Bv018	Bradypus variegatus	Urban	2023-04-01	0	0	0	0	0	0	0	0	0	0
Bv019	Bradypus variegatus	Urban	2023-05-02	1	0	0	0	0	1	0	0	0	1
Bv021	Bradypus variegatus	Primary Forest	2023-06-13	0	0	0	0	0	0	0	0	0	0
Bv022	Bradypus variegatus	Primary Forest	2023-06-13	1	0	0	0	1	0	0	0	1	1
Bv026	Bradypus variegatus	Primary Forest	2023-06-22	1	0	0	0	0	0	0	0	1	0
Bv027	Bradypus variegatus	Primary Forest	2023-06-22	1	0	0	0	0	0	0	1	0	1
Bv029	Bradypus variegatus	Primary Forest	2023-06-28	0	0	0	0	0	0	0	0	0	0
Bv033	Bradypus variegatus	Urban	2023-07-07	0	0	0	0	0	0	0	0	0	0
Ch001	Choloepus hoffmanni	Primary Forest	2023-03-10	1	1	1	1	0	0	0	0	0	3
Ch002	Choloepus hoffmanni	Primary Forest	2023-03-22	0	0	0	0	0	0	0	0	0	0
Ch003	Choloepus hoffmanni	Primary Forest	2023-04-18	1	1	0	1	0	0	0	0	0	2
Ch005	Choloepus hoffmanni	Urban	2023-05-18	1	0	0	1	0	0	0	0	0	1
Ch006	Choloepus hoffmanni	Primary Forest	2023-05-17	1	1	0	1	0	0	0	0	0	2
Ch007	Choloepus hoffmanni	Urban	2023-04-27	1	1	0	1	0	0	0	0	0	2
Ch009	Choloepus hoffmanni	Urban	2023-05-25	1	1	0	1	0	0	0	0	0	2
Ch010	Choloepus hoffmanni	Urban	2023-05-28	1	0	0	1	0	0	0	0	0	1
Ch016	Choloepus hoffmanni	Urban	2023-05-02	1	1	0	0	0	0	0	0	0	2
Ch025	Choloepus hoffmanni	Urban	2023-04-25	0	0	0	0	0	0	0	0	0	0
Ch031	Choloepus hoffmanni	Urban	2023-03-21	1	1	0	0	0	0	0	0	0	2
Ch039	Choloepus hoffmanni	Primary Forest	2023-06-28	1	0	0	1	0	0	0	0	0	1
Ch042	Choloepus hoffmanni	Urban	2023-07-06	0	0	0	0	0	0	0	0	0	0
Ch043	Choloepus hoffmanni	Urban	2023-07-03	1	0	0	1	0	0	0	0	0	1
Ch044	Choloepus hoffmanni	Urban	2023-07-09	0	0	0	0	0	0	0	0	0	0
Ch052	Choloepus hoffmanni	Urban	2023-07-14	0	0	0	0	0	0	0	0	0	0
